# Supplementary material for: Subsoiling increases aggregate-associated organic carbon, dry matter, and maize yield on the North China Plain
Source: PeerJ. 2021 Mar 24;9:e11099. doi: 10.7717/peerj.11099 (PMC8000453; doi:10.7717/peerj.11099)
Supplement: Data S1 [file peerj-09-11099-s001.xlsx]

## Sheet: Carbon
	Treatment Particle size	NT					RT					CT					SS
Soil depth		1	2	3	AVERAGE	STDEV.P	1	2	3	AVERAGE	STDEV.P	1	2	3	AVERAGE	STDEV.P	1	2	3	AVERAGE	STDEV.P
0-10 cm	5-2 mm	10.314	10.4124	10.3046	10.3437	0.0487732	9.512	9.324	9.5344	9.4568	0.094348	9.687	9.965	10.291	9.981	0.246841	10.3628	10.684	10.025	10.3573	0.269064
	2-0.25 mm	8.1254	7.654	8.4144	8.0646	0.313395	8.5388	7.786	7.512	7.9456	0.434115	6.948	7.1052	7.6146	7.2226	0.284518	7.912	8.465	8.3268	8.2346	0.234986
	0.25-0.053 mm	7.253	6.9123	7.0354	7.0669	0.140862	6.459	6.694	6.6446	6.5992	0.101167	6.5145	6.7985	6.4498	6.5876	0.15145	7.2967	7.4851	7.258	7.3466	0.0992005
10-20 cm	5-2 mm	9.512	9.401	9.3515	9.4215	0.0671081	9.156	9.1587	8.8254	9.0467	0.156487	8.5984	8.6425	8.7085	8.6498	0.0452436	9.155	9.7564	9.4866	9.466	0.245952
	2-0.25 mm	7.412	8.4295	7.605	7.8155	0.441255	7.615	7.024	7.7383	7.4591	0.311753	6.8624	7.5614	7.616	7.3466	0.343106	8.0357	8.462	7.6061	8.0346	0.349421
	0.25-0.053 mm	6.905	6.51	6.8695	6.7615	0.178427	6.2845	6.0563	6.2436	6.1948	0.0993475	6.54285	5.9422	6.12575	6.2036	0.251317	6.51258	6.892	6.96992	6.7915	0.199775
20-40 cm	5-2 mm	8.3056	7.0942	9.394	8.2646	0.939337	8.1524	7.8121	7.8753	7.9466	0.147792	8.564	9.1784	8.5412	8.7612	0.295152	8.3846	0.295152	8.8142	5.83132	3.91859
	2-0.25 mm	6.8596	7.5601	7.0291	7.1496	0.298402	6.349	6.7524	6.3914	6.4976	0.181	6.1544	6.8456	6.9938	6.6646	0.365804	8.1256	7.982	7.6362	7.9146	0.205402
	0.25-0.053 mm	5.871	6.2035	6.215	6.0965	0.159522	6.246	5.855	5.7358	5.9456	0.217918	6.2488	5.894	5.7264	5.9564	0.217785	0.217785	6.942	6.1683	4.4427	3.00411
unit: g/kg
NT – no-tillage, RT – rotary tillage, CT – conventional tillage, SS – subsoiling

## Sheet: Dry matter
	Anthesis								Maturity
	Leaf + culm				Ear				Vegetative plant part				Grain
Treatment	1	2	3	AVERAGE	1	2	3	AVERAGE	1	2	3	AVERAGE	1	2	3	AVERAGE
NT	235.829	235.481	259.46	243.59	72.11	70.19	68.18	70.16	190.767	180.94	183.48	185.062	169.83	169.59	175.98	171.8
RT	247.37	257.16	261.43	255.32	57.62	62.85	60.94	60.47	220.783	211.89	209.18	213.951	186.67	195.59	189.54	190.6
CT	297.06	275.49	279.15	283.9	75.56	76.58	79.58	77.24	239.62	241.59	225.89	235.7	194.8	198.54	215.96	203.1
SS	278.146	261.954	272.15	270.75	72.71	74.58	75.94	74.41	215.65	219.84	229.61	221.7	198.39	215.97	195.84	203.4
NT	238.21	258.13	241.24	245.86	64.45	66.75	69.89	67.03	180.589	194.59	184.59	186.59	163.24	170.59	159.67	164.5
RT	263.13	256.17	249.18	256.16	59.84	63.48	58.54	60.62	210.359	215.49	219.67	215.173	171.78	165.84	172.98	170.2
CT	273.18	275.15	259.48	269.27	67.03	78.91	71.89	72.61	228.18	229.49	245.97	234.547	198.51	195.48	214.41	202.8
SS	257.88	255.94	275.15	262.99	66.89	66.52	69.54	67.65	219.349	225.48	209.49	218.106	203.78	197.58	208.54	203.3
	unit: g
	NT – no-tillage, RT – rotary tillage, CT – conventional tillage, SS – subsoiling

## Sheet: Yield
	Grain per ear (grain/ear)				1000–grain weight (g)				Grain yield (Mg/ha)
Treatment	1	2	3	AVERAGE	1	2	3	AVERAGE	1	2	3	AVERAGE
NT	527.21	539.15	527.18	531.18	294.61	297.14	314.25	302	11.3277	11.3117	11.7379	11.4591
RT	552.02	548.18	570.23	556.81	312.59	307.45	315.24	311.76	12.4509	13.0459	12.6423	12.713
CT	546.56	561.47	549.68	552.57	314.16	305.94	315.57	311.89	12.9932	13.2426	14.4045	13.5468
SS	568.15	551.35	574.48	564.66	336.75	327.48	320.58	328.27	13.2326	14.4052	13.0625	13.5668
NT	592.29	580.24	571.25	581.26	327.77	324.34	328.47	326.86	10.8881	11.3784	10.65	10.9721
RT	565.67	552.98	541.25	553.3	336.79	329.84	339.24	335.29	11.4577	11.0615	11.5378	11.3523
CT	511.22	518.94	529.87	520.01	349.59	341.58	339.84	343.67	13.2406	13.0385	14.3011	13.5268
SS	600.2	600.14	587.18	595.84	346.44	351.89	338.17	345.5	13.5921	13.1786	13.9096	13.5601
NT – no-tillage, RT – rotary tillage, CT – conventional tillage, SS – subsoiling
